# Supplementary material for: Reconciling experimental catalytic data stemming from structure sensitivity
Source: Royal Society of Chemistry journal article supplement (doi:10.1039/d2sc06819b), 2023-01-01
Supplement: d2sc06819b2.xlsx [file d2sc06819b2.xlsx]

## Sheet: Supplementary Table S2 - GCN
GCN Scaling Relations
Species	GCN	Updated_DFT	Slope	Intercept	GCN_estimated	Error	ABS(Error)	MAE
CH	7.5	-12.7124	0.0651	-13.19	-12.7017	-0.010677	0.010677	0.06839
CH	6.95	-12.8204	0.0651	-13.19	-12.7376	-0.08287	0.08287
CH	6.41	-12.6687	0.0651	-13.19	-12.7727	0.103969	0.103969
CH	6	-12.7945	0.0651	-13.19	-12.7994	0.004858	0.004858
CH	6	-12.6594	0.0651	-13.19	-12.7994	0.140001	0.140001
CH	5.41	-12.79	0.0651	-13.19	-12.8378	0.047832	0.047832
CH	6.41	-12.6913	0.0651	-13.19	-12.7727	0.08139	0.08139
CH	7.09	-12.8442	0.0651	-13.19	-12.7284	-0.115768	0.115768
CH	7.59	-12.7125	0.0651	-13.19	-12.6959	-0.016569	0.016569
CH	6.77	-12.8076	0.0651	-13.19	-12.7493	-0.058349	0.058349
CH	3.27	-13.0671	0.0651	-13.19	-12.9771	-0.090007	0.090007
C	6.95	-8.20906	0.3327	-10.513	-8.20073	-0.008324	0.008324	0.092373
C	7.5	-8.05015	0.3327	-10.513	-8.01775	-0.032397	0.032397
C	6.41	-8.6373	0.3327	-10.513	-8.38039	-0.256909	0.256909
C	6	-8.28913	0.3327	-10.513	-8.5168	0.227665	0.227665
C	6	-8.40372	0.3327	-10.513	-8.5168	0.113078	0.113078
C	6.41	-8.34532	0.3327	-10.513	-8.38039	0.035071	0.035071
C	7.59	-8.03413	0.3327	-10.513	-7.98781	-0.046321	0.046321
C	6.77	-8.2187	0.3327	-10.513	-8.26062	0.041922	0.041922
C	3.27	-9.49474	0.3327	-10.513	-9.42507	-0.06967	0.06967
H2O	7.5	-14.5493	0.0902	-15.218	-14.5415	-0.007811	0.007811	0.0515452
H2O	6.67	-14.6081	0.0902	-15.218	-14.6164	0.008235	0.008235
H2O	5.83	-14.799	0.0902	-15.218	-14.6921	-0.106879	0.106879
H2O	5.5	-14.6826	0.0902	-15.218	-14.7219	0.03925	0.03925
H2O	5.5	-14.6916	0.0902	-15.218	-14.7219	0.030309	0.030309
H2O	5.5	-14.6765	0.0902	-15.218	-14.7219	0.045413	0.045413
H2O	2.5	-14.9893	0.0902	-15.218	-14.9925	0.003203	0.003203
H2O	3	-14.8621	0.0902	-15.218	-14.9474	0.085308	0.085308
H2O	2.92	-15.0165	0.0902	-15.218	-14.9546	-0.06188	0.06188
H2O	3.58	-14.8294	0.0902	-15.218	-14.8951	0.065691	0.065691
H2O	3.5	-15.0344	0.0902	-15.218	-14.9023	-0.13214	0.13214
H2O	4.42	-14.7869	0.0902	-15.218	-14.8193	0.032423	0.032423
O2	7.5	-10.0406	0.268	-12.285	-10.275	0.234388	0.234388	0.124312
O2	5.83	-10.9416	0.268	-12.285	-10.7226	-0.219083	0.219083
O2	5.5	-10.8473	0.268	-12.285	-10.811	-0.036292	0.036292
O2	5.5	-10.9365	0.268	-12.285	-10.811	-0.125467	0.125467
O2	5.5	-10.9276	0.268	-12.285	-10.811	-0.116555	0.116555
O2	2.92	-11.4422	0.268	-12.285	-11.5024	0.060279	0.060279
O2	3.5	-11.3236	0.268	-12.285	-11.347	0.023442	0.023442
O2	4.42	-10.9214	0.268	-12.285	-11.1004	0.178992	0.178992
OH	7.5	-9.87593	0.1242	-11.151	-10.2195	0.343569	0.343569	0.126655
OH	6.67	-10.5548	0.1242	-11.151	-10.3226	-0.232204	0.232204
OH	5.78	-10.4663	0.1242	-11.151	-10.4331	-0.033139	0.033139
OH	5.39	-10.622	0.1242	-11.151	-10.4816	-0.140471	0.140471
OH	5.44	-10.4132	0.1242	-11.151	-10.4754	0.062163	0.062163
OH	5.39	-10.6553	0.1242	-11.151	-10.4816	-0.173754	0.173754
OH	3	-10.6696	0.1242	-11.151	-10.7784	0.108782	0.108782
OH	2.5	-10.7389	0.1242	-11.151	-10.8405	0.10158	0.10158
OH	3.11	-10.6502	0.1242	-11.151	-10.7647	0.114522	0.114522
OH	2.83	-10.9064	0.1242	-11.151	-10.7995	-0.106899	0.106899
OH	3.17	-10.8306	0.1242	-11.151	-10.7573	-0.073296	0.073296
OH	4	-10.6247	0.1242	-11.151	-10.6542	0.02948	0.02948
O	6.95	-5.7418	0.1238	-6.7774	-5.91699	0.175185	0.175185	0.0759589
O	6.67	-6.02433	0.1238	-6.7774	-5.95165	-0.072676	0.072676
O	5.78	-6.12429	0.1238	-6.7774	-6.06184	-0.062456	0.062456
O	5.39	-6.19298	0.1238	-6.7774	-6.11012	-0.082864	0.082864
O	5.44	-6.01102	0.1238	-6.7774	-6.10393	0.092907	0.092907
O	5.39	-6.25639	0.1238	-6.7774	-6.11012	-0.14627	0.14627
O	3.11	-6.38223	0.1238	-6.7774	-6.39238	0.010153	0.010153
O	2.83	-6.4034	0.1238	-6.7774	-6.42705	0.023644	0.023644
O	3.27	-6.38762	0.1238	-6.7774	-6.37257	-0.01505	0.01505
O	4	-6.20382	0.1238	-6.7774	-6.2822	0.078384	0.078384
CHOO	7.5	-25.9628	0.1662	-27.405	-26.1585	0.195708	0.195708	0.112666
CHOO	6.67	-26.3093	0.1662	-27.405	-26.2964	-0.012889	0.012889
CHOO	5.83	-26.5298	0.1662	-27.405	-26.4361	-0.09377	0.09377
CHOO	5.5	-26.5338	0.1662	-27.405	-26.4909	-0.04286	0.04286
CHOO	5.5	-26.7183	0.1662	-27.405	-26.4909	-0.227354	0.227354
CHOO	5.5	-26.5654	0.1662	-27.405	-26.4909	-0.074531	0.074531
CHOO	3.58	-26.6038	0.1662	-27.405	-26.81	0.206195	0.206195
CHOO	2.92	-26.9279	0.1662	-27.405	-26.9197	-0.008226	0.008226
CHOO	3.5	-26.9255	0.1662	-27.405	-26.8233	-0.102157	0.102157
CHOO	4.42	-26.5074	0.1662	-27.405	-26.6704	0.162973	0.162973
CH4	7.5	-24.2906	0	0	-24.277	-0.0136077	0.0136077	0.0318583
CH4	6.67	-24.2923	0	0	-24.277	-0.0152898	0.0152898
CH4	5.83	-24.2707	0	0	-24.277	0.00629525	0.00629525
CH4	5.5	-24.2669	0	0	-24.277	0.0100763	0.0100763
CH4	5.5	-24.29	0	0	-24.277	-0.0130867	0.0130867
CH4	5.5	-24.2741	0	0	-24.277	0.00284625	0.00284625
CH4	2.5	-24.3152	0	0	-24.277	-0.0382268	0.0382268
CH4	3	-24.2044	0	0	-24.277	0.0725372	0.0725372
CH4	2.92	-24.2669	0	0	-24.277	0.0100402	0.0100402
CH4	3.58	-24.2192	0	0	-24.277	0.0577133	0.0577133
CH4	3.5	-24.3879	0	0	-24.277	-0.110939	0.110939
CH4	4.42	-24.2453	0	0	-24.277	0.0316412	0.0316412
CH3	7.5	-20.4605	0	0	-20.5617	0.101135	0.101135	0.0663333
CH3	6.67	-20.5525	0	0	-20.5617	0.0092185	0.0092185
CH3	5.83	-20.6103	0	0	-20.5617	-0.0486305	0.0486305
CH3	5.5	-20.5227	0	0	-20.5617	0.0389835	0.0389835
CH3	5.5	-20.5057	0	0	-20.5617	0.0559855	0.0559855
CH3	5.5	-20.5184	0	0	-20.5617	0.0432645	0.0432645
CH3	2.5	-20.4421	0	0	-20.5617	0.119622	0.119622
CH3	3	-20.5538	0	0	-20.5617	0.0078965	0.0078965
CH3	2.92	-20.6267	0	0	-20.5617	-0.0650205	0.0650205
CH3	3.58	-20.5696	0	0	-20.5617	-0.0079365	0.0079365
CH3	3.5	-20.8381	0	0	-20.5617	-0.276412	0.276412
CH3	4.42	-20.5398	0	0	-20.5617	0.0218935	0.0218935
CH2	7.33	-16.2994	0	0	-16.6351	0.335744	0.335744	0.130508
CH2	6.67	-16.7913	0	0	-16.6351	-0.156119	0.156119
CH2	5.78	-16.7966	0	0	-16.6351	-0.161454	0.161454
CH2	5.39	-16.7071	0	0	-16.6351	-0.0720038	0.0720038
CH2	5.44	-16.5831	0	0	-16.6351	0.0520322	0.0520322
CH2	5.39	-16.8119	0	0	-16.6351	-0.176747	0.176747
CH2	2.83	-16.7149	0	0	-16.6351	-0.0797748	0.0797748
CH2	3.11	-16.5664	0	0	-16.6351	0.0687592	0.0687592
CH2	3.17	-16.6416	0	0	-16.6351	-0.0064408	0.0064408
CH2	4	-16.4391	0	0	-16.6351	0.196003	0.196003
H	7.5	-3.93135	0	0	-3.9958	0.0644495	0.0644495	0.114738
H	6.67	-4.11505	0	0	-3.9958	-0.119251	0.119251
H	5.78	-4.0672	0	0	-3.9958	-0.0714005	0.0714005
H	5.39	-4.0775	0	0	-3.9958	-0.0816995	0.0816995
H	5.5	-3.95773	0	0	-3.9958	0.0380645	0.0380645
H	5.39	-4.13073	0	0	-3.9958	-0.134938	0.134938
H	2.5	-3.65252	0	0	-3.9958	0.343272	0.343272
H	3	-3.75316	0	0	-3.9958	0.242641	0.242641
H	2.83	-4.06382	0	0	-3.9958	-0.0680235	0.0680235
H	3.11	-4.11015	0	0	-3.9958	-0.114352	0.114352
H	3.17	-4.04784	0	0	-3.9958	-0.0520455	0.0520455
H	4	-4.04251	0	0	-3.9958	-0.0467165	0.0467165
CO2	7.5	-22.5879	0	0	-22.5425	-0.0453903	0.0453903	0.0393927
CO2	6.67	-22.6119	0	0	-22.5425	-0.0694093	0.0694093
CO2	5.83	-22.5556	0	0	-22.5425	-0.0130903	0.0130903
CO2	5.5	-22.5071	0	0	-22.5425	0.0354437	0.0354437
CO2	5.5	-22.6021	0	0	-22.5425	-0.0596143	0.0596143
CO2	5.5	-22.5392	0	0	-22.5425	0.00332467	0.00332467
CO2	2.5	-22.4463	0	0	-22.5425	0.0961807	0.0961807
CO2	3	-22.4579	0	0	-22.5425	0.0846077	0.0846077
CO2	2.92	-22.5521	0	0	-22.5425	-0.00954233	0.00954233
CO2	3.58	-22.5257	0	0	-22.5425	0.0167997	0.0167997
CO2	3.5	-22.5554	0	0	-22.5425	-0.0129213	0.0129213
CO2	4.42	-22.5689	0	0	-22.5425	-0.0263883	0.0263883
CO	6.95	-16.2993	0	0	-16.621	0.321766	0.321766	0.141431
CO	6.67	-16.7459	0	0	-16.621	-0.124846	0.124846
CO	5.78	-16.6902	0	0	-16.621	-0.069203	0.069203
CO	5.39	-16.5753	0	0	-16.621	0.045748	0.045748
CO	5.5	-16.569	0	0	-16.621	0.052005	0.052005
CO	5.39	-16.688	0	0	-16.621	-0.066998	0.066998
CO	2.5	-16.4452	0	0	-16.621	0.175866	0.175866
CO	3	-16.4173	0	0	-16.621	0.203709	0.203709
CO	2.92	-16.8449	0	0	-16.621	-0.22384	0.22384
CO	3.58	-16.5894	0	0	-16.621	0.031604	0.031604
CO	3.5	-16.9847	0	0	-16.621	-0.363699	0.363699
CO	4.42	-16.6031	0	0	-16.621	0.017888	0.017888
COH	6.95	-19.6528	0	0	-19.6167	-0.0361251	0.0361251	0.145709
COH	6.67	-19.8806	0	0	-19.6167	-0.26387	0.26387
COH	5.78	-19.68	0	0	-19.6167	-0.0632881	0.0632881
COH	5.39	-19.6229	0	0	-19.6167	-0.0062011	0.0062011
COH	5.44	-19.4631	0	0	-19.6167	0.153668	0.153668
COH	5.39	-19.7471	0	0	-19.6167	-0.130347	0.130347
COH	3.11	-19.3799	0	0	-19.6167	0.236787	0.236787
COH	2.83	-19.5549	0	0	-19.6167	0.0618589	0.0618589
COH	3.27	-19.8454	0	0	-19.6167	-0.228712	0.228712
COH	4	-19.3405	0	0	-19.6167	0.27623	0.27623
CHO	7.5	-19.4178	0	0	-19.4986	0.0807998	0.0807998	0.0825193
CHO	6.67	-19.5426	0	0	-19.4986	-0.0440142	0.0440142
CHO	5.83	-19.64	0	0	-19.4986	-0.141409	0.141409
CHO	5.5	-19.5005	0	0	-19.4986	-0.00184918	0.00184918
CHO	5.5	-19.4663	0	0	-19.4986	0.0323198	0.0323198
CHO	5.5	-19.5062	0	0	-19.4986	-0.00759618	0.00759618
CHO	3	-19.372	0	0	-19.4986	0.126666	0.126666
CHO	2.5	-19.4151	0	0	-19.4986	0.0835348	0.0835348
CHO	3.58	-19.3841	0	0	-19.4986	0.11454	0.11454
CHO	3.5	-19.7576	0	0	-19.4986	-0.258987	0.258987
CHO	4.42	-19.4826	0	0	-19.4986	0.0159958	0.0159958
COOH	7.5	-26.4078	0	0	-26.498	0.0901729	0.0901729	0.0650383
COOH	6.67	-26.5338	0	0	-26.498	-0.0358611	0.0358611
COOH	5.83	-26.6139	0	0	-26.498	-0.115889	0.115889
COOH	5.5	-26.4782	0	0	-26.498	0.0197679	0.0197679
COOH	5.5	-26.4931	0	0	-26.498	0.00486092	0.00486092
COOH	5.5	-26.4757	0	0	-26.498	0.0222709	0.0222709
COOH	2.5	-26.5252	0	0	-26.498	-0.0272511	0.0272511
COOH	3	-26.2986	0	0	-26.498	0.199402	0.199402
COOH	3.58	-26.4442	0	0	-26.498	0.0537549	0.0537549
COOH	2.92	-26.5716	0	0	-26.498	-0.0736111	0.0736111
COOH	3.5	-26.6307	0	0	-26.498	-0.132747	0.132747
COOH	4.42	-26.5029	0	0	-26.498	-0.00487008	0.00487008

## Sheet: Supplementary Table S2 - ML
ML Predictions
Adsorbate	Facet	Site	CN	n_metal	GCN	Valency	chi_ME	Bond_count	chi_NN	Molecular_mass		E_ads	ML_predict	Error	ABS_Error	MAE
CH4	111	top	9	1	7.5	0	2.55	4	2.2	16.043		-24.2906	-24.2824	-0.008171	0.008171	0.0261411
CH4	100	top	8	1	6.67	0	2.55	4	2.2	16.043		-24.2923	-24.2913	-0.000953	0.000953
CH4	110	top	7	1	5.83	0	2.55	4	2.2	16.043		-24.2707	-24.2898	0.019132	0.019132
CH4	211	top	7	1	5.5	0	2.55	4	2.2	16.043		-24.2669	-24.2756	0.008713	0.008713
CH4	221	top	7	1	5.5	0	2.55	4	2.2	16.043		-24.29	-24.2756	-0.01445	0.01445
CH4	322	top	7	1	5.5	0	2.55	4	2.2	16.043		-24.2741	-24.2756	0.001483	0.001483
CH4	1AD_111	top	3	1	2.5	0	2.55	4	2.2	16.043		-24.3152	-24.3183	0.00311	0.00311
CH4	1AD_100	top	4	1	3	0	2.55	4	2.2	16.043		-24.2044	-24.3047	0.100274	0.100274
CH4	2AD_111	top	4	1	2.92	0	2.55	4	2.2	16.043		-24.2669	-24.3955	0.128577	0.128577
CH4	2AD_100	top	5	1	3.58	0	2.55	4	2.2	16.043		-24.2192	-24.222	0.00275	0.00275
CH4	3AD_111	top	5	1	3.5	0	2.55	4	2.2	16.043		-24.3879	-24.3771	-0.010802	0.010802
CH4	4AD_100	top	6	1	4.42	0	2.55	4	2.2	16.043		-24.2453	-24.2606	0.015278	0.015278
CH3	111	top	9	1	7.5	1	2.55	3	2.2	15.035		-20.4605	-20.4402	-0.020345	0.020345	0.0193793
CH3	100	top	8	1	6.67	1	2.55	3	2.2	15.035		-20.5525	-20.5331	-0.019362	0.019362
CH3	110	top	7	1	5.83	1	2.55	3	2.2	15.035		-20.6103	-20.6159	0.005589	0.005589
CH3	211	top	7	1	5.5	1	2.55	3	2.2	15.035		-20.5227	-20.5162	-0.006497	0.006497
CH3	221	top	7	1	5.5	1	2.55	3	2.2	15.035		-20.5057	-20.5162	0.010505	0.010505
CH3	322	top	7	1	5.5	1	2.55	3	2.2	15.035		-20.5184	-20.5162	-0.002216	0.002216
CH3	1AD_111	top	3	1	2.5	1	2.55	3	2.2	15.035		-20.4421	-20.4405	-0.001558	0.001558
CH3	1AD_100	top	4	1	3	1	2.55	3	2.2	15.035		-20.5538	-20.5485	-0.005284	0.005284
CH3	2AD_111	top	4	1	2.92	1	2.55	3	2.2	15.035		-20.6267	-20.643	0.016299	0.016299
CH3	2AD_100	top	5	1	3.58	1	2.55	3	2.2	15.035		-20.5696	-20.5584	-0.011217	0.011217
CH3	3AD_111	top	5	1	3.5	1	2.55	3	2.2	15.035		-20.8381	-20.7279	-0.110193	0.110193
CH3	4AD_100	top	6	1	4.42	1	2.55	3	2.2	15.035		-20.5398	-20.5163	-0.023487	0.023487
CH2	111	bridge	9	2	7.33	2	2.55	2	2.2	14.027		-16.2994	-16.3209	0.021501	0.021501	0.0219806
CH2	100	bridge	8	2	6.67	2	2.55	2	2.2	14.027		-16.7913	-16.7977	0.006438	0.006438
CH2	110	bridge	7	2	5.78	2	2.55	2	2.2	14.027		-16.7966	-16.837	0.040403	0.040403
CH2	211	bridge	7	2	5.39	2	2.55	2	2.2	14.027		-16.7071	-16.7523	0.045153	0.045153
CH2	221	bridge	7	2	5.44	2	2.55	2	2.2	14.027		-16.5831	-16.5817	-0.001411	0.001411
CH2	322	bridge	7	2	5.39	2	2.55	2	2.2	14.027		-16.8119	-16.7523	-0.05959	0.05959
CH2	2AD_111	bridge	4	2	2.83	2	2.55	2	2.2	14.027		-16.7149	-16.7016	-0.013318	0.013318
CH2	2AD_100	bridge	5	2	3.11	2	2.55	2	2.2	14.027		-16.5664	-16.5831	0.016716	0.016716
CH2	3AD_111	bridge	5	2	3.17	2	2.55	2	2.2	14.027		-16.6416	-16.6442	0.002616	0.002616
CH2	4AD_100	bridge	6	2	4	2	2.55	2	2.2	14.027		-16.4391	-16.4518	0.01266	0.01266
CH	111	three-fold hollow	9	3	7.5	3	2.55	1	2.2	13.019		-12.7124	-12.7127	0.000273	0.000273	0.0176042
CH	111	three-fold hollow	9	3	6.95	3	2.55	1	2.2	13.019		-12.8204	-12.8321	0.011675	0.011675
CH	110	three-fold hollow	8.333	3	6.41	3	2.55	1	2.2	13.019		-12.6687	-12.6979	0.02916	0.02916
CH	211	three-fold hollow	7.667	3	6	3	2.55	1	2.2	13.019		-12.7945	-12.7948	0.000258	0.000258
CH	211	three-fold hollow	8.333	3	6	3	2.55	1	2.2	13.019		-12.6594	-12.7089	0.049501	0.049501
CH	221	three-fold hollow	7.667	3	5.41	3	2.55	1	2.2	13.019		-12.79	-12.787	-0.002977	0.002977
CH	221	three-fold hollow	8.333	3	6.41	3	2.55	1	2.2	13.019		-12.6913	-12.6979	0.006581	0.006581
CH	322	three-fold hollow	9	3	7.09	3	2.55	1	2.2	13.019		-12.8442	-12.8344	-0.009809	0.009809
CH	322	three-fold hollow	9	3	7.59	3	2.55	1	2.2	13.019		-12.7125	-12.6559	-0.05656	0.05656
CH	322	three-fold hollow	9	3	6.77	3	2.55	1	2.2	13.019		-12.8076	-12.7875	-0.020122	0.020122
CH	3AD_111	three-fold hollow	5	3	3.27	3	2.55	1	2.2	13.019		-13.0671	-13.0604	-0.00673	0.00673
C	111	three-fold hollow	9	3	6.95	4	2.55	0	0	12.011		-8.20906	-8.29312	0.084061	0.084061	0.13887
C	111	three-fold hollow	9	3	7.5	4	2.55	0	0	12.011		-8.05015	-8.05017	2.3e-05	2.3e-05
C	110	three-fold hollow	8.333	3	6.41	4	2.55	0	0	12.011		-8.6373	-8.5857	-0.051602	0.051602
C	211	three-fold hollow	7.667	3	6	4	2.55	0	0	12.011		-8.28913	-8.30388	0.014745	0.014745
C	211	three-fold hollow	8.333	3	6	4	2.55	0	0	12.011		-8.40372	-8.4168	0.013078	0.013078
C	221	three-fold hollow	8.333	3	6.41	4	2.55	0	0	12.011		-8.34532	-8.5857	0.240378	0.240378
C	322	three-fold hollow	9	3	7.59	4	2.55	0	0	12.011		-8.03413	-8.0249	-0.009228	0.009228
C	322	three-fold hollow	9	3	6.77	4	2.55	0	0	12.011		-8.2187	-8.2486	0.029901	0.029901
C	3AD_111	three-fold hollow	5	3	3.27	4	2.55	0	0	12.011		-9.49474	-8.68793	-0.806811	0.806811
CO	111	three-fold hollow	9	3	6.95	1	2.55	3	3.44	28.01		-16.2993	-16.2945	-0.004756	0.004756	0.0714895
CO	100	bridge	8	2	6.67	1	2.55	3	3.44	28.01		-16.7459	-16.5306	-0.215268	0.215268
CO	110	bridge	7	2	5.78	1	2.55	3	3.44	28.01		-16.6902	-16.5407	-0.149525	0.149525
CO	211	bridge	7	2	5.39	1	2.55	3	3.44	28.01		-16.5753	-16.6228	0.047526	0.047526
CO	221	top	7	1	5.5	1	2.55	3	3.44	28.01		-16.569	-16.5569	-0.012117	0.012117
CO	322	bridge	7	2	5.39	1	2.55	3	3.44	28.01		-16.688	-16.6228	-0.06522	0.06522
CO	1AD_111	top	3	1	2.5	1	2.55	3	3.44	28.01		-16.4452	-16.4685	0.023344	0.023344
CO	1AD_100	top	4	1	3	1	2.55	3	3.44	28.01		-16.4173	-16.5873	0.169987	0.169987
CO	2AD_111	top	4	1	2.92	1	2.55	3	3.44	28.01		-16.8449	-16.8043	-0.040562	0.040562
CO	2AD_100	top	5	1	3.58	1	2.55	3	3.44	28.01		-16.5894	-16.5911	0.001682	0.001682
CO	3AD_111	top	5	1	3.5	1	2.55	3	3.44	28.01		-16.9847	-16.868	-0.116721	0.116721
CO	4AD_100	top	6	1	4.42	1	2.55	3	3.44	28.01		-16.6031	-16.6143	0.011166	0.011166
COH	111	three-fold hollow	9	3	6.95	3	2.55	1	3.44	29.018		-19.6528	-19.6634	0.010551	0.010551	0.0267563
COH	100	bridge	8	2	6.67	3	2.55	1	3.44	29.018		-19.8806	-19.8426	-0.037994	0.037994
COH	110	bridge	7	2	5.78	3	2.55	1	3.44	29.018		-19.68	-19.6864	0.006388	0.006388
COH	211	bridge	7	2	5.39	3	2.55	1	3.44	29.018		-19.6229	-19.6546	0.031675	0.031675
COH	221	bridge	7	2	5.44	3	2.55	1	3.44	29.018		-19.4631	-19.4736	0.010544	0.010544
COH	322	bridge	7	2	5.39	3	2.55	1	3.44	29.018		-19.7471	-19.6546	-0.092471	0.092471
COH	2AD_100	bridge	5	2	3.11	3	2.55	1	3.44	29.018		-19.3799	-19.3985	0.018563	0.018563
COH	2AD_111	bridge	4	2	2.83	3	2.55	1	3.44	29.018		-19.5549	-19.5599	0.005035	0.005035
COH	3AD_111	three-fold hollow	5	3	3.27	3	2.55	1	3.44	29.018		-19.8454	-19.8322	-0.013236	0.013236
COH	4AD_100	bridge	6	2	4	3	2.55	1	3.44	29.018		-19.3405	-19.3816	0.041106	0.041106
CHO	111	top	9	1	7.5	1	2.55	3	3.44	29.018		-19.4178	-19.4386	0.020773	0.020773	0.0281692
CHO	100	top	8	1	6.67	1	2.55	3	3.44	29.018		-19.5426	-19.5386	-0.004041	0.004041
CHO	110	top	7	1	5.83	1	2.55	3	3.44	29.018		-19.64	-19.5873	-0.052736	0.052736
CHO	211	top	7	1	5.5	1	2.55	3	3.44	29.018		-19.5005	-19.4553	-0.045176	0.045176
CHO	221	top	7	1	5.5	1	2.55	3	3.44	29.018		-19.4663	-19.4553	-0.011007	0.011007
CHO	322	top	7	1	5.5	1	2.55	3	3.44	29.018		-19.5062	-19.4553	-0.050923	0.050923
CHO	1AD_100	top	4	1	3	1	2.55	3	3.44	29.018		-19.372	-19.3812	0.009239	0.009239
CHO	1AD_111	top	3	1	2.5	1	2.55	3	3.44	29.018		-19.4151	-19.4228	0.007708	0.007708
CHO	2AD_100	top	5	1	3.58	1	2.55	3	3.44	29.018		-19.3841	-19.4226	0.038513	0.038513
CHO	3AD_111	top	5	1	3.5	1	2.55	3	3.44	29.018		-19.7576	-19.7151	-0.042514	0.042514
CHO	4AD_100	top	6	1	4.42	1	2.55	3	3.44	29.018		-19.4826	-19.4554	-0.027231	0.027231
COOH	111	top	9	1	7.5	1	2.55	3	3.44	45.017		-26.4078	-26.4559	0.048093	0.048093	0.0196993
COOH	100	top	8	1	6.67	1	2.55	3	3.44	45.017		-26.5338	-26.5401	0.006259	0.006259
COOH	110	top	7	1	5.83	1	2.55	3	3.44	45.017		-26.6139	-26.5817	-0.032169	0.032169
COOH	211	top	7	1	5.5	1	2.55	3	3.44	45.017		-26.4782	-26.4952	0.016988	0.016988
COOH	221	top	7	1	5.5	1	2.55	3	3.44	45.017		-26.4931	-26.4952	0.002081	0.002081
COOH	322	top	7	1	5.5	1	2.55	3	3.44	45.017		-26.4757	-26.4952	0.019491	0.019491
COOH	1AD_111	top	3	1	2.5	1	2.55	3	3.44	45.017		-26.5252	-26.5139	-0.011331	0.011331
COOH	1AD_100	top	4	1	3	1	2.55	3	3.44	45.017		-26.2986	-26.3301	0.031522	0.031522
COOH	2AD_100	top	5	1	3.58	1	2.55	3	3.44	45.017		-26.4442	-26.4264	-0.017825	0.017825
COOH	2AD_111	top	4	1	2.92	1	2.55	3	3.44	45.017		-26.5716	-26.5832	0.011609	0.011609
COOH	3AD_111	top	5	1	3.5	1	2.55	3	3.44	45.017		-26.6307	-26.6591	0.028373	0.028373
COOH	4AD_100	top	6	1	4.42	1	2.55	3	3.44	45.017		-26.5029	-26.4922	-0.01065	0.01065
CO2	111	top	9	1	7.5	0	2.55	4	3.44	44.009		-22.5879	-22.5867	-0.001205	0.001205	0.0130908
CO2	100	top	8	1	6.67	0	2.55	4	3.44	44.009		-22.6119	-22.6106	-0.001324	0.001324
CO2	110	top	7	1	5.83	0	2.55	4	3.44	44.009		-22.5556	-22.5694	0.013795	0.013795
CO2	211	top	7	1	5.5	0	2.55	4	3.44	44.009		-22.5071	-22.5452	0.038129	0.038129
CO2	221	top	7	1	5.5	0	2.55	4	3.44	44.009		-22.6021	-22.5452	-0.056929	0.056929
CO2	322	top	7	1	5.5	0	2.55	4	3.44	44.009		-22.5392	-22.5452	0.00601	0.00601
CO2	1AD_111	top	3	1	2.5	0	2.55	4	3.44	44.009		-22.4463	-22.4464	6.6e-05	6.6e-05
CO2	1AD_100	top	4	1	3	0	2.55	4	3.44	44.009		-22.4579	-22.4443	-0.013607	0.013607
CO2	2AD_111	top	4	1	2.92	0	2.55	4	3.44	44.009		-22.5521	-22.5619	0.009843	0.009843
CO2	2AD_100	top	5	1	3.58	0	2.55	4	3.44	44.009		-22.5257	-22.5207	-0.005015	0.005015
CO2	3AD_111	top	5	1	3.5	0	2.55	4	3.44	44.009		-22.5554	-22.5596	0.004164	0.004164
CO2	4AD_100	top	6	1	4.42	0	2.55	4	3.44	44.009		-22.5689	-22.5619	-0.007003	0.007003
CHOO	111	top	9	1	7.5	1	3.44	1	2.55	45.017		-25.9628	-26.1194	0.156608	0.156608	0.0654959
CHOO	100	top	8	1	6.67	1	3.44	1	2.55	45.017		-26.3093	-26.4512	0.141865	0.141865
CHOO	110	top	7	1	5.83	1	3.44	1	2.55	45.017		-26.5298	-26.5468	0.016976	0.016976
CHOO	211	top	7	1	5.5	1	3.44	1	2.55	45.017		-26.5338	-26.5967	0.06294	0.06294
CHOO	221	top	7	1	5.5	1	3.44	1	2.55	45.017		-26.7183	-26.5967	-0.121554	0.121554
CHOO	322	top	7	1	5.5	1	3.44	1	2.55	45.017		-26.5654	-26.5967	0.031269	0.031269
CHOO	2AD_100	top	5	1	3.58	1	3.44	1	2.55	45.017		-26.6038	-26.6145	0.010691	0.010691
CHOO	2AD_111	top	4	1	2.92	1	3.44	1	2.55	45.017		-26.9279	-26.9274	-0.000522	0.000522
CHOO	3AD_111	top	5	1	3.5	1	3.44	1	2.55	45.017		-26.9255	-26.9073	-0.018157	0.018157
CHOO	4AD_100	top	6	1	4.42	1	3.44	1	2.55	45.017		-26.5074	-26.6018	0.094377	0.094377
O2	111	top	9	1	7.5	0	3.44	2	3.44	31.998		-10.0406	-10.0369	-0.003712	0.003712	0.0309462
O2	110	top	7	1	5.83	0	3.44	2	3.44	31.998		-10.9416	-10.9695	0.027857	0.027857
O2	211	top	7	1	5.5	0	3.44	2	3.44	31.998		-10.8473	-10.9032	0.055908	0.055908
O2	221	top	7	1	5.5	0	3.44	2	3.44	31.998		-10.9365	-10.9032	-0.033267	0.033267
O2	322	top	7	1	5.5	0	3.44	2	3.44	31.998		-10.9276	-10.9032	-0.024355	0.024355
O2	2AD_111	top	4	1	2.92	0	3.44	2	3.44	31.998		-11.4422	-11.4379	-0.004261	0.004261
O2	3AD_111	top	5	1	3.5	0	3.44	2	3.44	31.998		-11.3236	-11.3229	-0.000658	0.000658
O2	4AD_100	top	6	1	4.42	0	3.44	2	3.44	31.998		-10.9214	-11.019	0.097552	0.097552
H2O	111	top	9	1	7.5	0	3.44	2	2.2	18.015		-14.5493	-14.135	-0.414311	0.414311	0.0656247
H2O	100	top	8	1	6.67	0	3.44	2	2.2	18.015		-14.6081	-14.6195	0.011369	0.011369
H2O	110	top	7	1	5.83	0	3.44	2	2.2	18.015		-14.799	-14.7578	-0.041213	0.041213
H2O	211	top	7	1	5.5	0	3.44	2	2.2	18.015		-14.6826	-14.7019	0.01925	0.01925
H2O	221	top	7	1	5.5	0	3.44	2	2.2	18.015		-14.6916	-14.7019	0.010309	0.010309
H2O	322	top	7	1	5.5	0	3.44	2	2.2	18.015		-14.6765	-14.7019	0.025413	0.025413
H2O	1AD_111	top	3	1	2.5	0	3.44	2	2.2	18.015		-14.9893	-14.8983	-0.090997	0.090997
H2O	1AD_100	top	4	1	3	0	3.44	2	2.2	18.015		-14.8621	-14.8275	-0.034592	0.034592
H2O	2AD_111	top	4	1	2.92	0	3.44	2	2.2	18.015		-15.0165	-14.9501	-0.066396	0.066396
H2O	2AD_100	top	5	1	3.58	0	3.44	2	2.2	18.015		-14.8294	-14.7913	-0.038093	0.038093
H2O	3AD_111	top	5	1	3.5	0	3.44	2	2.2	18.015		-15.0344	-15.0374	0.00296	0.00296
H2O	4AD_100	top	6	1	4.42	0	3.44	2	2.2	18.015		-14.7869	-14.7543	-0.032593	0.032593
OH	111	top	9	1	7.5	1	3.44	1	2.2	17.007		-9.87593	-9.74019	-0.135741	0.135741	0.0573582
OH	100	bridge	8	2	6.67	1	3.44	1	2.2	17.007		-10.5548	-10.5271	-0.02769	0.02769
OH	110	bridge	7	2	5.78	1	3.44	1	2.2	17.007		-10.4663	-10.4802	0.013937	0.013937
OH	211	bridge	7	2	5.39	1	3.44	1	2.2	17.007		-10.622	-10.6458	0.023767	0.023767
OH	221	bridge	7	2	5.44	1	3.44	1	2.2	17.007		-10.4132	-10.5435	0.130311	0.130311
OH	322	bridge	7	2	5.39	1	3.44	1	2.2	17.007		-10.6553	-10.6458	-0.009516	0.009516
OH	1AD_100	top	4	1	3	1	3.44	1	2.2	17.007		-10.6696	-10.6514	-0.018218	0.018218
OH	1AD_111	top	3	1	2.5	1	3.44	1	2.2	17.007		-10.7389	-10.7312	-0.00772	0.00772
OH	2AD_100	bridge	5	2	3.11	1	3.44	1	2.2	17.007		-10.6502	-10.6786	0.028384	0.028384
OH	2AD_111	bridge	4	2	2.83	1	3.44	1	2.2	17.007		-10.9064	-10.7518	-0.154613	0.154613
OH	3AD_111	bridge	5	2	3.17	1	3.44	1	2.2	17.007		-10.8306	-10.7173	-0.113282	0.113282
OH	4AD_100	bridge	6	2	4	1	3.44	1	2.2	17.007		-10.6247	-10.5996	-0.02512	0.02512
O	111	three-fold hollow	9	3	6.95	2	3.44	0	0	15.999		-5.7418	-5.72717	-0.014635	0.014635	0.0357863
O	100	bridge	8	2	6.67	2	3.44	0	0	15.999		-6.02433	-6.02127	-0.00306	0.00306
O	110	bridge	7	2	5.78	2	3.44	0	0	15.999		-6.12429	-6.0989	-0.025392	0.025392
O	211	bridge	7	2	5.39	2	3.44	0	0	15.999		-6.19298	-6.21716	0.024178	0.024178
O	221	bridge	7	2	5.44	2	3.44	0	0	15.999		-6.01102	-6.04613	0.035109	0.035109
O	322	bridge	7	2	5.39	2	3.44	0	0	15.999		-6.25639	-6.21716	-0.039228	0.039228
O	2AD_100	bridge	5	2	3.11	2	3.44	0	0	15.999		-6.38223	-6.36135	-0.020879	0.020879
O	2AD_111	bridge	4	2	2.83	2	3.44	0	0	15.999		-6.4034	-6.28877	-0.114632	0.114632
O	3AD_111	three-fold hollow	5	3	3.27	2	3.44	0	0	15.999		-6.38762	-6.32219	-0.065434	0.065434
O	4AD_100	bridge	6	2	4	2	3.44	0	0	15.999		-6.20382	-6.1885	-0.015316	0.015316
H	111	top	9	1	7.5	1	2.2	0	0	1.008		-3.93135	-3.94043	0.009083	0.009083	0.0593513
H	100	bridge	8	2	6.67	1	2.2	0	0	1.008		-4.11505	-4.1313	0.016252	0.016252
H	110	bridge	7	2	5.78	1	2.2	0	0	1.008		-4.0672	-4.07607	0.008873	0.008873
H	211	bridge	7	2	5.39	1	2.2	0	0	1.008		-4.0775	-4.09365	0.016154	0.016154
H	221	top	7	1	5.5	1	2.2	0	0	1.008		-3.95773	-3.94832	-0.009412	0.009412
H	322	bridge	7	2	5.39	1	2.2	0	0	1.008		-4.13073	-4.09365	-0.037084	0.037084
H	1AD_111	top	3	1	2.5	1	2.2	0	0	1.008		-3.65252	-3.64937	-0.003154	0.003154
H	1AD_100	top	4	1	3	1	2.2	0	0	1.008		-3.75316	-4.05859	0.305434	0.305434
H	2AD_111	bridge	4	2	2.83	1	2.2	0	0	1.008		-4.06382	-3.92199	-0.14183	0.14183
H	2AD_100	bridge	5	2	3.11	1	2.2	0	0	1.008		-4.11015	-4.07782	-0.032329	0.032329
H	3AD_111	bridge	5	2	3.17	1	2.2	0	0	1.008		-4.04784	-4.05524	0.007398	0.007398
H	4AD_100	bridge	6	2	4	1	2.2	0	0	1.008		-4.04251	-3.9173	-0.125213	0.125213

## Sheet: Supplementary Fig.S2
Species	DFT	Estimation	Error
C	-8.20906	-8.20073	-0.008324
C	-8.05015	-8.01775	-0.032397
C	-8.6373	-8.38039	-0.256909
C	-8.28913	-8.5168	0.227665
C	-8.40372	-8.5168	0.113078
C	-8.34532	-8.38039	0.035071
C	-8.03413	-7.98781	-0.046321
C	-8.2187	-8.26062	0.041922
C	-9.49474	-9.42507	-0.06967
H2O	-14.5493	-14.5415	-0.007811
H2O	-14.6081	-14.6164	0.008235
H2O	-14.799	-14.6921	-0.106879
H2O	-14.6826	-14.7219	0.03925
H2O	-14.6916	-14.7219	0.030309
H2O	-14.6765	-14.7219	0.045413
H2O	-14.9893	-14.9925	0.003203
H2O	-14.8621	-14.9474	0.085308
H2O	-15.0165	-14.9546	-0.06188
H2O	-14.8294	-14.8951	0.065691
H2O	-15.0344	-14.9023	-0.13214
H2O	-14.7869	-14.8193	0.032423
CH4	-24.2906	-24.2824	-0.008171
CH4	-24.2923	-24.2913	-0.000953
CH4	-24.2707	-24.2898	0.019132
CH4	-24.2669	-24.2756	0.008713
CH4	-24.29	-24.2756	-0.01445
CH4	-24.2741	-24.2756	0.001483
CH4	-24.3152	-24.3183	0.00311
CH4	-24.2044	-24.3047	0.100274
CH4	-24.2669	-24.3955	0.128577
CH4	-24.2192	-24.222	0.00275
CH4	-24.3879	-24.3771	-0.010802
CH4	-24.2453	-24.2606	0.015278
CH3	-20.4605	-20.4402	-0.020345
CH3	-20.5525	-20.5331	-0.019362
CH3	-20.6103	-20.6159	0.005589
CH3	-20.5227	-20.5162	-0.006497
CH3	-20.5057	-20.5162	0.010505
CH3	-20.5184	-20.5162	-0.002216
CH3	-20.4421	-20.4405	-0.001558
CH3	-20.5538	-20.5485	-0.005284
CH3	-20.6267	-20.643	0.016299
CH3	-20.5696	-20.5584	-0.011217
CH3	-20.8381	-20.7279	-0.110193
CH3	-20.5398	-20.5163	-0.023487
CH2	-16.2994	-16.3209	0.021501
CH2	-16.7913	-16.7977	0.006438
CH2	-16.7966	-16.837	0.040403
CH2	-16.7071	-16.7523	0.045153
CH2	-16.5831	-16.5817	-0.001411
CH2	-16.8119	-16.7523	-0.05959
CH2	-16.7149	-16.7016	-0.013318
CH2	-16.5664	-16.5831	0.016716
CH2	-16.6416	-16.6442	0.002616
CH2	-16.4391	-16.4518	0.01266
CH	-12.7124	-12.7127	0.000273
CH	-12.8204	-12.8321	0.011675
CH	-12.6687	-12.6979	0.02916
CH	-12.7945	-12.7948	0.000258
CH	-12.6594	-12.7089	0.049501
CH	-12.79	-12.787	-0.002977
CH	-12.6913	-12.6979	0.006581
CH	-12.8442	-12.8344	-0.009809
CH	-12.7125	-12.6559	-0.05656
CH	-12.8076	-12.7875	-0.020122
CH	-13.0671	-13.0604	-0.00673
CO	-16.2993	-16.2945	-0.004756
CO	-16.7459	-16.5306	-0.215268
CO	-16.6902	-16.5407	-0.149525
CO	-16.5753	-16.6228	0.047526
CO	-16.569	-16.5569	-0.012117
CO	-16.688	-16.6228	-0.06522
CO	-16.4452	-16.4685	0.023344
CO	-16.4173	-16.5873	0.169987
CO	-16.8449	-16.8043	-0.040562
CO	-16.5894	-16.5911	0.001682
CO	-16.9847	-16.868	-0.116721
CO	-16.6031	-16.6143	0.011166
COH	-19.6528	-19.6634	0.010551
COH	-19.8806	-19.8426	-0.037994
COH	-19.68	-19.6864	0.006388
COH	-19.6229	-19.6546	0.031675
COH	-19.4631	-19.4736	0.010544
COH	-19.7471	-19.6546	-0.092471
COH	-19.3799	-19.3985	0.018563
COH	-19.5549	-19.5599	0.005035
COH	-19.8454	-19.8322	-0.013236
COH	-19.3405	-19.3816	0.041106
CHO	-19.4178	-19.4386	0.020773
CHO	-19.5426	-19.5386	-0.004041
CHO	-19.64	-19.5873	-0.052736
CHO	-19.5005	-19.4553	-0.045176
CHO	-19.4663	-19.4553	-0.011007
CHO	-19.5062	-19.4553	-0.050923
CHO	-19.372	-19.3812	0.009239
CHO	-19.4151	-19.4228	0.007708
CHO	-19.3841	-19.4226	0.038513
CHO	-19.7576	-19.7151	-0.042514
CHO	-19.4826	-19.4554	-0.027231
COOH	-26.4078	-26.4559	0.048093
COOH	-26.5338	-26.5401	0.006259
COOH	-26.6139	-26.5817	-0.032169
COOH	-26.4782	-26.4952	0.016988
COOH	-26.4931	-26.4952	0.002081
COOH	-26.4757	-26.4952	0.019491
COOH	-26.5252	-26.5139	-0.011331
COOH	-26.2986	-26.3301	0.031522
COOH	-26.4442	-26.4264	-0.017825
COOH	-26.5716	-26.5832	0.011609
COOH	-26.6307	-26.6591	0.028373
COOH	-26.5029	-26.4922	-0.01065
CO2	-22.5879	-22.5867	-0.001205
CO2	-22.6119	-22.6106	-0.001324
CO2	-22.5556	-22.5694	0.013795
CO2	-22.5071	-22.5452	0.038129
CO2	-22.6021	-22.5452	-0.056929
CO2	-22.5392	-22.5452	0.00601
CO2	-22.4463	-22.4464	6.6e-05
CO2	-22.4579	-22.4443	-0.013607
CO2	-22.5521	-22.5619	0.009843
CO2	-22.5257	-22.5207	-0.005015
CO2	-22.5554	-22.5596	0.004164
CO2	-22.5689	-22.5619	-0.007003
CHOO	-25.9628	-26.1194	0.156608
CHOO	-26.3093	-26.4512	0.141865
CHOO	-26.5298	-26.5468	0.016976
CHOO	-26.5338	-26.5967	0.06294
CHOO	-26.7183	-26.5967	-0.121554
CHOO	-26.5654	-26.5967	0.031269
CHOO	-26.6038	-26.6145	0.010691
CHOO	-26.9279	-26.9274	-0.000522
CHOO	-26.9255	-26.9073	-0.018157
CHOO	-26.5074	-26.6018	0.094377
O2	-10.0406	-10.0369	-0.003712
O2	-10.9416	-10.9695	0.027857
O2	-10.8473	-10.9032	0.055908
O2	-10.9365	-10.9032	-0.033267
O2	-10.9276	-10.9032	-0.024355
O2	-11.4422	-11.4379	-0.004261
O2	-11.3236	-11.3229	-0.000658
O2	-10.9214	-11.019	0.097552
OH	-9.87593	-9.74019	-0.135741
OH	-10.5548	-10.5271	-0.02769
OH	-10.4663	-10.4802	0.013937
OH	-10.622	-10.6458	0.023767
OH	-10.4132	-10.5435	0.130311
OH	-10.6553	-10.6458	-0.009516
OH	-10.6696	-10.6514	-0.018218
OH	-10.7389	-10.7312	-0.00772
OH	-10.6502	-10.6786	0.028384
OH	-10.9064	-10.7518	-0.154613
OH	-10.8306	-10.7173	-0.113282
OH	-10.6247	-10.5996	-0.02512
O	-5.7418	-5.72717	-0.014635
O	-6.02433	-6.02127	-0.00306
O	-6.12429	-6.0989	-0.025392
O	-6.19298	-6.21716	0.024178
O	-6.01102	-6.04613	0.035109
O	-6.25639	-6.21716	-0.039228
O	-6.38223	-6.36135	-0.020879
O	-6.4034	-6.28877	-0.114632
O	-6.38762	-6.32219	-0.065434
O	-6.20382	-6.1885	-0.015316
H	-3.93135	-3.94043	0.009083
H	-4.11505	-4.1313	0.016252
H	-4.0672	-4.07607	0.008873
H	-4.0775	-4.09365	0.016154
H	-3.95773	-3.94832	-0.009412
H	-4.13073	-4.09365	-0.037084
H	-3.65252	-3.64937	-0.003154
H	-3.75316	-4.05859	0.305434
H	-4.06382	-3.92199	-0.14183
H	-4.11015	-4.07782	-0.032329
H	-4.04784	-4.05524	0.007398
H	-4.04251	-3.9173	-0.125213
